# Supplementary material for: Primary Tumor Resection in Synchronous Metastatic Colorectal Cancer Patients Treated with Upfront Chemotherapy plus Bevacizumab: A Pooled Analysis of TRIBE and TRIBE2 Studies
Source: MDPI journal article supplement (doi:10.3390/cancers15225451), 2023-11-16
Supplement: s1 [file s1]

**Table S1.** Uni- and multivariate analyses for progression-free survival.

| CHARACTERISTICS                   | N   | Months | UNIVARIATE ANALYSIS |          | MULTIVARIATE ANALYSIS |          |
|-----------------------------------|-----|--------|---------------------|----------|-----------------------|----------|
|                                   |     |        | HR (95% CI)         | <i>p</i> | HR (95% CI)           | <i>P</i> |
| <b>Treatment Arm</b>              |     |        |                     |          |                       |          |
| <i>Doublet CT + bevacizumab</i>   | 502 | 9.6    | 1                   | <0.001   | 1                     | 0.001    |
| <i>FOLFOXIRI + bevacizumab</i>    | 497 | 11.9   | 0.74 (0.65-0.84)    |          | 0.76 (0.66-0.87)      |          |
| <b>Age</b>                        |     |        |                     |          |                       |          |
| ≥70 years                         | 141 | 10.8   | 1                   | 0.70     | -                     |          |
| <70 years                         | 858 | 10.6   | 0.96 (0.80-1.16)    |          |                       |          |
| <b>ECOG PS</b>                    |     |        |                     |          |                       |          |
| 1-2                               | 131 | 7.8    | 1                   | <0.001   | 1                     | <0.001   |
| 0                                 | 868 | 11.2   | 0.57 (0.47-0.68)    |          | 0.61 (0.50-0.75)      |          |
| <b>Liver-Only Disease</b>         |     |        |                     |          |                       |          |
| Yes                               | 276 | 12.2   | 1                   | 0.0006   | 1                     | 0.018    |
| No                                | 721 | 9.9    | 1.29 (1.11-1.49)    |          | 0.69 (0.51-0.94)      |          |
| Missing                           | 2   | 24.3   |                     |          |                       |          |
| <b>Number of metastatic sites</b> |     |        |                     |          |                       |          |
| 1                                 | 352 | 12.3   | 1                   | <0.001   | 1                     | <0.001   |
| >1                                | 645 | 9.7    | 1.44 (1.26-1.66)    |          | 1.80 (1.34-2.40)      |          |
| Missing                           | 2   | 24.3   |                     |          |                       |          |
| <b>Resected Primary Tumor</b>     |     |        |                     |          |                       |          |
| No                                | 486 | 10.0   | 1                   | 0.0005   | 1                     | 0.032    |
| Yes                               | 513 | 11.1   | 0.80 (0.70-0.91)    |          | 0.85 (0.74-0.99)      |          |
| <b>Gender</b>                     |     |        |                     |          |                       |          |
| Female                            | 414 | 10.9   | 1                   | 0.20     | -                     |          |
| Male                              | 585 | 10.6   | 1.09 (0.96-1.24)    |          |                       |          |
| <b>Site of Primary Tumor</b>      |     |        |                     |          |                       |          |
| Right                             | 360 | 10.0   | 1                   | 0.17     | -                     |          |
| Left                              | 617 | 11.2   | 0.91 (0.79-1.04)    |          |                       |          |
| Missing                           | 22  | 9.4    |                     |          |                       |          |
| <b>RAS/BRAF Mutational Status</b> |     |        |                     |          |                       |          |
| <i>RAS/BRAF wild-type</i>         | 193 | 12.3   | 1                   |          | 1                     |          |
| <i>RAS mutated</i>                | 576 | 10.3   | 1.24 (1.04-1.47)    | 0.0154   | 1.24 (1.04-1.47)      | 0.016    |
| <i>BRAF mutated</i>               | 84  | 7.4    | 1.82 (1.40-2.38)    | <0.001   | 1.93 (1.47-2.54)      | <0.001   |
| <i>Missing</i>                    | 146 | 11.6   |                     |          |                       |          |

N: number; HR: Hazard Ratio; CI: Confidence Interval; ECOG PS: Eastern Cooperative Oncology Group Performance Status.

**Table S2.** Uni- and multivariate analyses for overall survival.

| CHARACTERISTICS                   | N   | Months | UNIVARIATE ANALYSIS |                  | MULTIVARIATE ANALYSIS |                  |
|-----------------------------------|-----|--------|---------------------|------------------|-----------------------|------------------|
|                                   |     |        | HR (95% CI)         | <i>p</i>         | HR (95% CI)           | <i>P</i>         |
| <b>Treatment Arm</b>              |     |        |                     |                  |                       |                  |
| <i>Doublet CT + bevacizumab</i>   | 502 | 23.0   | 1                   | <b>0.016</b>     | 1                     | <b>0.13</b>      |
| <i>FOLFOXIRI + bevacizumab</i>    | 497 | 26.9   | 0.84 (0.72-0.97)    |                  | 0.88 (0.75-1.04)      |                  |
| <b>Age</b>                        |     |        |                     |                  |                       |                  |
| <i>≥70 years</i>                  | 141 | 23.6   | 1                   | <b>0.23</b>      | -                     |                  |
| <i>&lt;70 years</i>               | 858 | 24.8   | 0.88 (0.72-1.08)    |                  |                       |                  |
| <b>ECOG PS</b>                    |     |        |                     |                  |                       |                  |
| <i>1-2</i>                        | 131 | 15.2   | 1                   | <b>&lt;0.001</b> | 1                     | <b>&lt;0.001</b> |
| <i>0</i>                          | 868 | 26.3   | 0.46 (0.37-0.56)    |                  | 0.49 (0.39-0.60)      |                  |
| <b>Liver-Only Disease</b>         |     |        |                     |                  |                       |                  |
| <i>Yes</i>                        | 276 | 31.4   | 1                   | <b>&lt;0.001</b> | 1                     | <b>0.30</b>      |
| <i>No</i>                         | 721 | 22.7   | 1.48 (1.25-1.75)    |                  | 0.83 (0.58-1.18)      |                  |
| <i>Missing</i>                    | 2   | 28.4   |                     |                  |                       |                  |
| <b>Number of metastatic sites</b> |     |        |                     |                  |                       |                  |
| <i>1</i>                          | 352 | 30.3   | 1                   | <b>&lt;0.001</b> | 1                     | <b>0.0061</b>    |
| <i>&gt;1</i>                      | 645 | 21.6   | 1.55 (1.32-1.81)    |                  | 1.59 (1.14-2.22)      |                  |
| <i>Missing</i>                    | 2   | 28.4   |                     |                  |                       |                  |
| <b>Resected Primary Tumor</b>     |     |        |                     |                  |                       |                  |
| <i>No</i>                         | 486 | 22.5   | 1                   | <b>&lt;0.001</b> | 1                     | <b>0.018</b>     |
| <i>Yes</i>                        | 513 | 26.6   | 0.78 (0.67-0.90)    |                  | 0.82 (0.70-0.97)      |                  |
| <b>Gender</b>                     |     |        |                     |                  |                       |                  |
| <i>Female</i>                     | 414 | 26.1   | 1                   | <b>0.52</b>      | -                     |                  |
| <i>Male</i>                       | 585 | 24.2   | 1.05 (0.91-1.22)    |                  |                       |                  |
| <b>Site of Primary Tumor</b>      |     |        |                     |                  |                       |                  |
| <i>Right</i>                      | 360 | 20.6   | 1                   | <b>&lt;0.001</b> | 1                     | <b>0.018</b>     |
| <i>Left</i>                       | 617 | 26.9   | 0.72 (0.62-0.84)    |                  | 0.81 (0.68-0.97)      |                  |
| <i>Missing</i>                    | 22  | 21.8   |                     |                  |                       |                  |
| <b>RAS/BRAF Mutational Status</b> |     |        |                     |                  |                       |                  |
| <i>RAS/BRAF wild-type</i>         | 193 | 35.8   | 1                   |                  |                       |                  |
| <i>RAS mutated</i>                | 576 | 23.7   | 1.73 (1.41-2.14)    | <b>&lt;0.001</b> | 1.69 (1.36-2.09)      | <b>&lt;0.001</b> |
| <i>BRAF mutated</i>               | 84  | 14.0   | 3.17 (2.36-4.27)    | <b>&lt;0.001</b> | 3.03 (2.20-4.16)      | <b>&lt;0.001</b> |
| <i>Missing</i>                    | 146 | 26.5   |                     |                  |                       |                  |

N: number; HR: Hazard Ratio; CI: Confidence Interval; ECOG PS: Eastern Cooperative Oncology Group Performance Status.
